# Supplementary material for: Tryptophan Modulatory Role in European Seabass (Dicentrarchus labrax) Immune Response to Acute Inflammation under Stressful Conditions
Source: MDPI journal article supplement (doi:10.3390/ijms232012475), 2022-10-18
Supplement: s1 [file s1]

## Supplementary Material

Tryptophan modulatory role in European seabass (*Dicentrarchus labrax*) immune response to acute inflammation under stressful conditions

Marina Machado<sup>1</sup>, Diogo Peixoto<sup>1,2,3</sup>, Paulo Santos<sup>1</sup>, Ana Ricardo<sup>1,2</sup>, Inês Duarte<sup>1,2</sup>, Inês Carvalho<sup>1,2</sup>, Cláudia Aragão<sup>4</sup>, Rita Azeredo<sup>1</sup>, Benjamín Costas<sup>1,2</sup>

Table S1. Head-kidney gene expression of European seabass reared at high density, fed dietary treatments for 15 days (0h), and sampled 4, 24, 48 and 72 hours post bacterial challenge.

| Genes          | Dietary treatments |                 |                 |                 |               |                |                 |                 |                  |               |
|----------------|--------------------|-----------------|-----------------|-----------------|---------------|----------------|-----------------|-----------------|------------------|---------------|
|                | CTRL               |                 |                 |                 |               |                |                 |                 |                  |               |
|                | Ø                  |                 |                 |                 |               | Stress         |                 |                 |                  |               |
|                | 0h                 | 4h              | 24h             | 48h             | 72h           | 0h             | 4h              | 24h             | 48h              | 72h           |
| <i>tgfb</i>    | 0.97 ± 0.48 ABC    | 0.56 ± 0.27 B#  | 1.01 ± 0.28 AB# | 1.38 ± 0.16 A#  | 0.07 ± 0.02 C | 0.70 ± 0.15 BC | 1.07 ± 0.22 B*  | 1.82 ± 0.30 aA* | 0.28 ± 0.08 bC*  | 0.08 ± 0.03 D |
| <i>tnfa</i>    | 0.93 ± 0.27 B      | 2.06 ± 0.51 B   | 3.05 ± 0.88 bA# | 4.68 ± 1.9 A*   | 0.34 ± 0.11 B | 0.74 ± 0.26 C  | 3.34 ± 1.01 B   | 5.84 ± 1.52 aA* | 0.53 ± 0.20 C#   | 0.27 ± 0.08 C |
| <i>cxc4</i>    | 1.03 ± 0.31 A      | 0.80 ± 0.1 A    | 0.59 ± 0.10 AB  | 0.71 ± 0.14 B   | 0.04 ± 0.01 B | 0.95 ± 0.15 A  | 0.79 ± 0.17 B   | 0.69 ± 0.22 B   | 0.13 ± 0.02 bB   | 0.06 ± 0.02 C |
| <i>il1b</i>    | 0.94 ± 0.45        | 224.64 ± 103.91 | 43.55 ± 17.85   | 17.71 ± 8.33    | 1.06 ± 0.41   | 1.62 ± 0.58    | 427.65 ± 306.87 | 60.66 ± 17.11   | 2.65 ± 0.85      | 0.90 ± 0.38   |
| <i>cd8a</i>    | 1.10 ± 0.59 B      | 1.83 ± 0.62 B   | 0.89 ± 0.26 C   | 3.06 ± 0.72 aA* | 0.28 ± 0.22 C | 0.79 ± 0.23 AB | 1.29 ± 0.32 A   | 1.55 ± 0.64 A   | 0.36 ± 0.09 bB#  | 0.21 ± 0.09 B |
| <i>cd8b</i>    | 0.90 ± 0.42 B      | 0.82 ± 0.29 B#  | 0.65 ± 0.17 B   | 1.96 ± 0.57 A#  | 0.28 ± 0.03 B | 0.57 ± 0.24 B  | 1.92 ± 1.27 aA* | 1.23 ± 0.61 AB  | 0.27 ± 0.08 bB*  | 0.26 ± 0.08 B |
| <i>cd4</i>     | 1.22 ± 0.92        | 36.13 ± 28.26   | 35.92 ± 27.01 b | 5.86 ± 3.15     | 0.29 ± 0.16   | 0.94 ± 0.35    | 28.47 ± 15.60   | 35.45 ± 19.66   | 0.61 ± 0.18      | 0.50 ± 0.14   |
| <i>cd3zeta</i> | 1.05 ± 0.37 A      | 1.20 ± 0.37 A   | 0.99 ± 0.42 A   | 1.14 ± 0.25 A*  | 0.06 ± 0.03 B | 0.70 ± 0.16 B  | 1.33 ± 0.32 A   | 0.93 ± 0.30 A   | 0.21 ± 0.07 bB#  | 0.05 ± 0.02 C |
| <i>tcra</i>    | 1.00 ± 0.17 B      | 1.14 ± 0.26 B   | 1.12 ± 0.32 B   | 2.41 ± 0.89 A*  | 0.35 ± 0.16 B | 0.60 ± 0.21 AB | 1.28 ± 0.52 A   | 1.19 ± 0.13 AB  | 0.36 ± 0.11 bB#  | 0.37 ± 0.23 B |
| <i>mc2r</i>    | 0.92 ± 0.20        | 0.90 ± 0.58     | 0.39 ± 0.21     | 0.90 ± 0.70     | 0.05 ± 0.03   | 0.58 ± 0.27    | 0.75 ± 0.60     | 0.27 ± 0.24     | 0.10 ± 0.04      | 0.05 ± 0.02   |
| <i>afmid</i>   | 1.38 ± 1.10 A      | 0.96 ± 0.36 AB# | 1.51 ± 0.51 A   | 1.98 ± 0.50 A*  | 0.09 ± 0.03 B | 0.51 ± 0.21 BC | 2.08 ± 0.58 A*  | 1.27 ± 0.37 AB  | 0.44 ± 0.19 bBC# | 0.16 ± 0.08 C |
| <i>ido2</i>    | 1.00 ± 0.16 C      | 2.04 ± 0.37 B   | 2.64 ± 0.98 A   | 4.60 ± 1.84 A*  | 0.42 ± 0.19 C | 0.44 ± 0.14 B  | 3.39 ± 0.96 A   | 3.99 ± 0.97 A   | 0.74 ± 0.21 bB#  | 0.39 ± 0.15 B |
|                |                    |                 |                 |                 |               |                |                 |                 |                  |               |
| Genes          | Dietary treatments |                 |                 |                 |               |                |                 |                 |                  |               |
|                | TRP                |                 |                 |                 |               |                |                 |                 |                  |               |

|                | Ø              |                 |                   |                |               | Stress         |                 |                 |                |               |
|----------------|----------------|-----------------|-------------------|----------------|---------------|----------------|-----------------|-----------------|----------------|---------------|
|                | 0h             | 4h              | 24h               | 48h            | 72h           | 0h             | 4h              | 24h             | 48h            | 72h           |
| <i>tgfb</i>    | 1.10 ± 0.43 B  | 0.64 ± 0.35 B   | 1.03 ± 0.48 B     | 1.24 ± 0.18 B  | 0.09 ± 0.02 A | 0.61 ± 0.16 B  | 1.12 ± 0.09 AB  | 0.97 ± 0.13 bAB | 1.32 ± 0.30 aA | 0.06 ± 0.02 C |
| <i>tnfa</i>    | 0.64 ± 0.25 C  | 1.68 ± 0.70 BC  | 5.05 ± 2.30 aA    | 3.65 ± 1.68 AB | 0.65 ± 0.46 C | 0.79 ± 0.24 B  | 3.21 ± 1.01 A   | 3.57 ± 1.23 bA  | 1.94 ± 0.78 AB | 0.24 ± 0.05 B |
| <i>cxcr4</i>   | 0.89 ± 0.13 A  | 0.76 ± 0.11 A   | 0.69 ± 0.10 A     | 0.74 ± 0.18 A  | 0.05 ± 0.02 B | 0.80 ± 0.21 A  | 0.73 ± 0.07 A   | 0.61 ± 0.19 A   | 0.85 ± 0.20 aA | 0.06 ± 0.03 B |
| <i>il1b</i>    | 0.96 ± 0.24    | 176.78 ± 72.12  | 77.20 ± 48.06     | 17.79 ± 7.34   | 2.24 ± 2.12   | 1.35 ± 0.72    | 216.26 ± 65.30  | 52.94 ± 11.65   | 9.93 ± 2.59    | 0.98 ± 0.38   |
| <i>cd8a</i>    | 0.74 ± 0.23 BC | 1.17 ± 0.38 AB  | 0.82 ± 0.32 B     | 1.69 ± 0.83 bA | 0.33 ± 0.21 C | 0.82 ± 0.20 B  | 1.64 ± 0.31 AB  | 0.98 ± 0.44 B   | 1.90 ± 0.65 aA | 0.22 ± 0.08 C |
| <i>cd8b</i>    | 0.71 ± 0.43 AB | 0.92 ± 0.50 AB  | 0.95 ± 0.36 AB    | 1.41 ± 0.63 A  | 0.30 ± 0.08 B | 0.60 ± 0.49 AB | 0.78 ± 0.18 bAB | 1.25 ± 0.70 A   | 1.41 ± 0.63 aA | 0.28 ± 0.08 B |
| <i>cd4</i>     | 1.23 ± 0.34 B  | 35.12 ± 39.77 B | 99.78 ± 65.52 aA* | 5.89 ± 3.60 B  | 0.52 ± 0.25 B | 1.13 ± 0.39    | 36.22 ± 29.04   | 38.83 ± 11.37 # | 2.68 ± 1.42    | 0.47 ± 0.20   |
| <i>cd3zeta</i> | 1.01 ± 0.11 B  | 1.01 ± 0.34 A#  | 0.98 ± 0.48 A     | 1.12 ± 0.42 A  | 0.07 ± 0.02 A | 0.71 ± 0.3 B   | 1.71 ± 0.27 A*  | 0.77 ± 0.25 B   | 1.11 ± 0.34 aB | 0.05 ± 0.01 C |
| <i>tcra</i>    | 0.88 ± 0.33 BC | 0.98 ± 0.34 BC  | 1.27 ± 0.44 B     | 2.15 ± 0.64 A  | 0.40 ± 0.14 C | 0.64 ± 0.20 C  | 1.70 ± 0.51 AB  | 1.02 ± 0.41 B   | 1.95 ± 0.76 aA | 0.36 ± 0.19 C |
| <i>mc2r</i>    | 0.82 ± 0.37    | 0.81 ± 0.83     | 1.04 ± 1.12       | 0.69 ± 0.60    | 0.04 ± 0.03   | 0.42 ± 0.20    | 0.63 ± 0.51     | 0.55 ± 0.18     | 0.49 ± 0.30    | 0.05 ± 0.02   |
| <i>afmid</i>   | 1.72 ± 1.13 AB | 0.67 ± 0.25 BC# | 1.20 ± 0.42 ABC   | 2.05 ± 0.69 A  | 0.13 ± 0.03 C | 0.72 ± 0.24 BC | 1.92 ± 0.68 AB* | 1.09 ± 0.29 B   | 2.26 ± 0.73 aA | 0.10 ± 0.06 C |
| <i>ido2</i>    | 0.74 ± 0.42 C  | 1.65 ± 0.56 B   | 2.91 ± 1.30 AB    | 3.34 ± 1.55 A  | 0.59 ± 0.24 C | 0.58 ± 0.23 B  | 2.62 ± 0.52 A   | 2.61 ± 0.78 A   | 3.03 ± 0.90 aA | 0.39 ± 0.16 B |

## Multifactorial ANOVA

[illegible]

*ido2*      ns      ns      <0.001      ns      ns      <0.001      <0.001

---

Values represent means  $\pm$  SD (n = 10). Different symbols stand for statistically significant differences attributed to stress. Capital letters stand for statistically significant differences attributed to sampling time. Low case letters stand for significant differences attributed to dietary treatment (Multifactorial ANOVA; Tukey post-hoc test; ns: non-significant;  $P \leq 0.05$ ).
